# Supplementary material
Source: MDPI journal article supplement (https://www.mdpi.com/2075-4701/12/11/1802)

## Article

# Synthesis of complex concentrated nanoparticles by Ultrasonic Spray Pyrolysis and Lyophilisation – Supplementary materials

Lidija Simić<sup>1</sup>, Srećko Stopić<sup>2</sup>, Bernd Friedrich<sup>2</sup>, Matej Zdravc<sup>1</sup>, Žiga Jelen<sup>1</sup>, Rajko Bobovnik<sup>3</sup>, Ivan Anžel<sup>1</sup>, Rebeka Rudolf<sup>1,4\*</sup>

Structure data for detected phases, output generated by CrystalDiffract 6 for macOS

Copyright (c) 1996-2021 CrystalMaker Software Limited (crystallmaker.com)

## Name and formula

**1. Reference code:** 00-007-0218

Compound name: Ammonium Platinum Chloride

PDF index name: Ammonium Platinum Chloride

Empirical formula:  $\text{Cl}_6\text{H}_8\text{N}_2\text{Pt}$

Chemical formula:  $(\text{NH}_4)_2\text{PtCl}_6$

## Crystallographic parameters

Crystal system: Cubic

Space group: Fm3m

Space group number: 225

a (Å): 9.8580

b (Å): 9.8580

c (Å): 9.8580

Alpha (°): 90.0000

Beta (°): 90.0000

Gamma (°): 90.0000

Calculated density (g/cm<sup>3</sup>): 3.08  
Volume of cell (10<sup>6</sup> pm<sup>3</sup>): 958.00  
Z: 4.00

RIR: -

### Subfiles and quality

Subfiles: Common Phase  
Forensic  
Inorganic  
NBS pattern  
Quality: Star (S)

### Comments

Color: Yellow  
Creation Date: 1/1/1970  
Modification Date: 1/1/1970  
Optical Data: A=1.835  
Color: Yellow  
Sample Preparation: Sample prepared at NBS from NH<sub>4</sub>Cl and H<sub>2</sub>PtCl<sub>6</sub>  
Analysis: Spectroscopic analysis shows <0.1% Na; <0.01% Si; <0.001% Ca, Fe, Mg  
Temperature of Data Collection: Pattern made at 25 C. Merck Index, 8th Ed., p. 71.

### References

Primary reference: *Natl. Bur. Stand. (U.S.), Circ. 539, 5, 3, (1955)*

### Peak list

| No. | h | k | l | d [Å]   | 2Theta[deg] | I [%] |
|-----|---|---|---|---------|-------------|-------|
| 1   | 1 | 1 | 1 | 5.69700 | 15.542      | 100.0 |
| 2   | 2 | 0 | 0 | 4.92900 | 17.982      | 70.0  |
| 3   | 2 | 2 | 0 | 3.48500 | 25.539      | 30.0  |
| 4   | 3 | 1 | 1 | 2.97310 | 30.032      | 55.0  |
| 5   | 2 | 2 | 2 | 2.84640 | 31.403      | 4.0   |
| 6   | 4 | 0 | 0 | 2.46550 | 36.412      | 45.0  |
| 7   | 3 | 3 | 1 | 2.26180 | 39.823      | 20.0  |
| 8   | 4 | 2 | 0 | 2.20460 | 40.902      | 35.0  |
| 9   | 4 | 2 | 2 | 2.01240 | 45.012      | 14.0  |

---

|    |    |   |   |         |         |      |
|----|----|---|---|---------|---------|------|
| 10 | 5  | 1 | 1 | 1.89710 | 47.913  | 25.0 |
| 11 | 4  | 4 | 0 | 1.74270 | 52.465  | 25.0 |
| 12 | 5  | 3 | 1 | 1.66620 | 55.072  | 20.0 |
| 13 | 6  | 0 | 0 | 1.64310 | 55.914  | 16.0 |
| 14 | 6  | 2 | 0 | 1.55890 | 59.225  | 4.0  |
| 15 | 5  | 3 | 3 | 1.50340 | 61.644  | 4.0  |
| 16 | 4  | 4 | 4 | 1.42300 | 65.547  | 6.0  |
| 17 | 7  | 1 | 1 | 1.38050 | 67.833  | 12.0 |
| 18 | 6  | 4 | 0 | 1.36720 | 68.584  | 8.0  |
| 19 | 6  | 4 | 2 | 1.31730 | 71.572  | 4.0  |
| 20 | 7  | 3 | 1 | 1.28330 | 73.776  | 8.0  |
| 21 | 8  | 0 | 0 | 1.23250 | 77.363  | 2.0  |
| 22 | 7  | 3 | 3 | 1.20420 | 79.536  | 2.0  |
| 23 | 8  | 2 | 0 | 1.19560 | 80.223  | 6.0  |
| 24 | 6  | 6 | 0 | 1.16170 | 83.070  | 4.0  |
| 25 | 7  | 5 | 1 | 1.13820 | 85.184  | 6.0  |
| 26 | 8  | 4 | 0 | 1.10210 | 88.684  | 10.0 |
| 27 | 9  | 1 | 1 | 1.08200 | 90.783  | 4.0  |
| 28 | 8  | 4 | 2 | 1.07550 | 91.487  | 6.0  |
| 29 | 6  | 6 | 4 | 1.05070 | 94.299  | 2.0  |
| 30 | 9  | 3 | 1 | 1.03330 | 96.400  | 6.0  |
| 31 | 8  | 4 | 4 | 1.00600 | 99.940  | 6.0  |
| 32 | 7  | 7 | 1 | 0.99070 | 102.070 | 6.0  |
| 33 | 8  | 6 | 0 | 0.98580 | 102.777 | 4.0  |
| 34 | 10 | 2 | 0 | 0.96660 | 105.673 | 4.0  |
| 35 | 9  | 5 | 1 | 0.95290 | 107.875 | 6.0  |
| 36 | 9  | 5 | 3 | 0.91920 | 113.861 | 8.0  |
| 37 | 10 | 4 | 0 | 0.91530 | 114.615 | 6.0  |
| 38 | 10 | 4 | 2 | 0.89990 | 117.737 | 2.0  |
| 39 | 11 | 1 | 1 | 0.88880 | 120.149 | 2.0  |
| 40 | 8  | 8 | 0 | 0.87130 | 124.277 | 6.0  |
| 41 | 11 | 3 | 1 | 0.86140 | 126.822 | 5.0  |
| 42 | 10 | 4 | 4 | 0.85800 | 127.737 | 3.0  |
| 43 | 11 | 3 | 3 | 0.83610 | 134.234 | 3.0  |
| 44 | 12 | 0 | 0 | 0.82150 | 139.329 | 4.0  |
| 45 | 11 | 5 | 1 | 0.81310 | 142.654 | 2.0  |
| 46 | 12 | 2 | 0 | 0.81030 | 143.844 | 1.0  |
| 47 | 12 | 2 | 2 | 0.79960 | 148.883 | 2.0  |
| 48 | 11 | 5 | 3 | 0.79180 | 153.235 | 6.0  |

**Stick Pattern**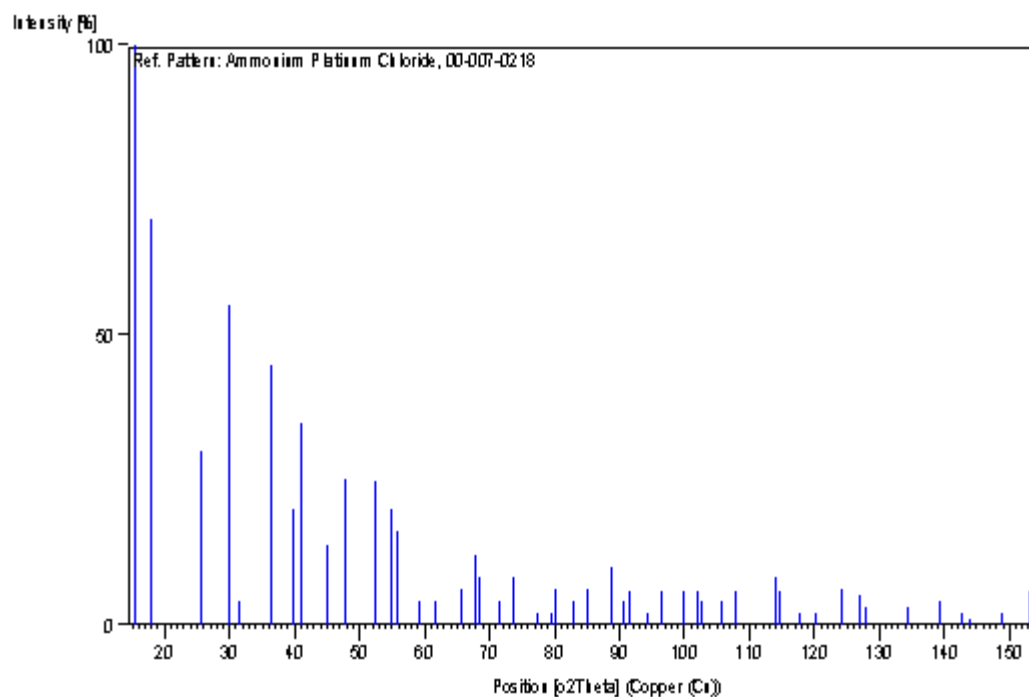

**2. Reference code:** 00-052-0746

Compound name: Ammonium Nickel Platinum Chloride Hydrate

PDF index name: Ammonium Nickel Platinum Chloride Hydrate

Empirical formula:  $\text{Cl}_6\text{H}_{19}\text{N}_6\text{NiO}_{0.5}\text{Pt}$

Chemical formula:  $(\text{NH}_3)_6\text{NiPtCl}_6 \times 0.5\text{H}_2\text{O}$

**Crystallographic parameters**

Crystal system: Cubic

Space group: Pa-3

Space group number: 205

a (Å): 11.6320

b (Å): 11.6320

c (Å): 11.6320

Alpha (°): 90.0000

Beta (°): 90.0000

Gamma (°): 90.0000

Volume of cell ( $10^6 \text{ pm}^3$ ): 1573.85

Z: 4.00

RIR: -

### Subfiles and quality

Subfiles: Inorganic

Quality: Indexed (I)

### Comments

Color: Yellow

Creation Date: 1/1/1970

Modification Date: 1/1/1970

Color: Yellow

Sample Preparation:  $\text{Ni}(\text{NH}_3)_6\text{Cl}_2$  was dissolved in aqueous ammonia, then added to a solution of  $\text{Na}_2\text{PtCl}_6 \cdot 6\text{H}_2\text{O}$ . Both solutions were cooled to 0 °C before mixing

Analysis: Chemical analysis (wt.%): Pt 33.5, Ni 10.1, Cl 37.2, N 14.7, H 3.3.

### References

Primary reference: Val'kovskii, M., Bol'shakova, L., Lapkin, V., *Russ. J. Inorg. Chem. (Engl. Transl.)*, **41**, 213, (1996)

### Peak list

| No. | h | k | l | d [Å]   | 2Theta[deg] | I [%] |
|-----|---|---|---|---------|-------------|-------|
| 1   | 1 | 1 | 1 | 6.74786 | 13.110      | 33.0  |
| 2   | 2 | 0 | 0 | 5.84795 | 15.138      | 100.0 |
| 3   | 2 | 2 | 0 | 4.12350 | 21.533      | 69.0  |
| 4   | 3 | 1 | 1 | 3.52017 | 25.280      | 17.0  |
| 5   | 2 | 2 | 2 | 3.36343 | 26.479      | 33.0  |
| 6   | 3 | 2 | 2 | 2.82257 | 31.675      | 21.0  |
| 7   | 3 | 3 | 1 | 2.67104 | 33.523      | 21.0  |
| 8   | 4 | 2 | 0 | 2.60183 | 34.442      | 29.0  |
| 9   | 4 | 2 | 1 | 2.54044 | 35.302      | 6.0   |
| 10  | 4 | 2 | 2 | 2.37569 | 37.839      | 42.0  |
| 11  | 3 | 3 | 3 | 2.23947 | 40.237      | 14.0  |

|    |   |   |   |         |        |      |
|----|---|---|---|---------|--------|------|
| 12 | 4 | 4 | 0 | 2.05700 | 43.984 | 24.0 |
| 13 | 5 | 3 | 1 | 1.96610 | 46.132 | 19.0 |
| 14 | 4 | 4 | 2 | 1.93718 | 46.861 | 31.0 |
| 15 | 6 | 2 | 0 | 1.83787 | 49.559 | 18.0 |
| 16 | 5 | 3 | 3 | 1.77284 | 51.507 | 6.0  |
| 17 | 6 | 2 | 2 | 1.75385 | 52.106 | 13.0 |
| 18 | 4 | 4 | 4 | 1.67938 | 54.604 | 3.0  |
| 19 | 5 | 5 | 1 | 1.62818 | 56.472 | 11.0 |
| 20 | 6 | 4 | 0 | 1.61250 | 57.071 | 10.0 |
| 21 | 6 | 4 | 2 | 1.55356 | 59.449 | 15.0 |
| 22 | 5 | 5 | 3 | 1.51553 | 61.097 | 7.0  |
| 23 | 6 | 4 | 4 | 1.41032 | 66.212 | 11.0 |

### Stick Pattern

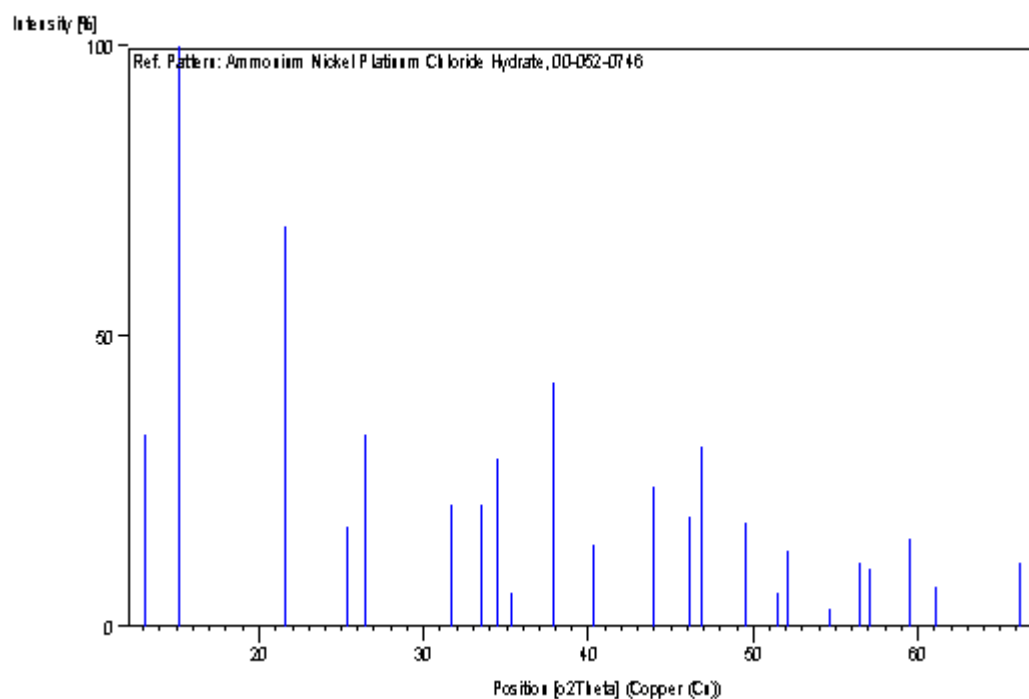

**Reference code:** 01-074-0925

Compound name: Platinum Ammine Chloride  
 Common name: Magnus green salt  
 ICSD name: Platinum Ammine Chloride

Empirical formula:  $\text{Cl}_4\text{H}_{12}\text{N}_4\text{Pt}_2$

Chemical formula:  $\text{Pt}_2(\text{NH}_3)_4\text{Cl}_4$

**Crystallographic parameters**

Crystal system: Tetragonal  
Space group: P4/mnc  
Space group number: 128

a (Å): 9.0300  
b (Å): 9.0300  
c (Å): 6.4900  
Alpha (°): 90.0000  
Beta (°): 90.0000  
Gamma (°): 90.0000

Calculated density (g/cm<sup>3</sup>): 3.77  
Volume of cell (10<sup>6</sup> pm<sup>3</sup>): 529.20  
Z: 2.00

RIR: 13.31

**Subfiles and quality**

Subfiles: Corrosion  
Inorganic  
Modelled additional pattern  
Quality: Calculated (C)

**Comments**

ICSD collection code: 026615  
Creation Date: 1/1/1970  
Modification Date: 1/1/1970  
ICSD Collection Code: 026615  
Calculated Pattern Original Remarks: ATOM H 1 +1 24.00 Atoms not located in unit cell  
Test from ICSD: At least one TF missing  
Test from ICSD: Calc. density unusual but tolerable  
Additional Patterns: See PDF 34-193.

**References**

Primary reference:

*Calculated from ICSD using POWD-12++, (1997)*

Structure:

Atoji, M., Richardson, J.W., Rundle, R.E., *J. Am. Chem. Soc.*, **79**, 3017, (1957)

**Peak list**

| No. | h | k | l | d [Å]   | 2Theta[deg] | I [%] |
|-----|---|---|---|---------|-------------|-------|
| 1   | 1 | 1 | 0 | 6.38517 | 13.858      | 100.0 |
| 2   | 1 | 0 | 1 | 5.27007 | 16.809      | 1.4   |
| 3   | 2 | 0 | 0 | 4.51500 | 19.646      | 34.0  |
| 4   | 2 | 1 | 0 | 4.03834 | 21.993      | 0.6   |
| 5   | 2 | 1 | 1 | 3.42875 | 25.966      | 1.6   |
| 6   | 0 | 0 | 2 | 3.24500 | 27.464      | 20.0  |
| 7   | 2 | 2 | 0 | 3.19259 | 27.924      | 5.1   |
| 8   | 1 | 1 | 2 | 2.89286 | 30.886      | 23.7  |
| 9   | 3 | 1 | 0 | 2.85554 | 31.300      | 20.9  |
| 10  | 3 | 0 | 1 | 2.73061 | 32.771      | 0.3   |
| 11  | 2 | 0 | 2 | 2.63503 | 33.995      | 14.9  |
| 12  | 3 | 1 | 1 | 2.61372 | 34.281      | 4.3   |
| 13  | 2 | 1 | 2 | 2.52954 | 35.459      | 0.3   |
| 14  | 3 | 2 | 0 | 2.50447 | 35.826      | 0.1   |
| 15  | 3 | 2 | 1 | 2.33653 | 38.498      | 0.1   |
| 16  | 2 | 2 | 2 | 2.27580 | 39.568      | 4.1   |
| 17  | 4 | 0 | 0 | 2.25750 | 39.902      | 8.5   |
| 18  | 4 | 1 | 0 | 2.19010 | 41.185      | 0.1   |
| 19  | 3 | 1 | 2 | 2.14371 | 42.118      | 16.8  |
| 20  | 3 | 3 | 0 | 2.12839 | 42.436      | 4.5   |
| 21  | 1 | 0 | 3 | 2.10380 | 42.956      | 0.2   |
| 22  | 4 | 1 | 1 | 2.07513 | 43.580      | 0.3   |
| 23  | 4 | 2 | 0 | 2.01917 | 44.852      | 9.3   |
| 24  | 3 | 2 | 2 | 1.98265 | 45.725      | 0.1   |
| 25  | 4 | 2 | 1 | 1.92801 | 47.098      | 0.1   |
| 26  | 2 | 1 | 3 | 1.90695 | 47.650      | 0.2   |
| 27  | 4 | 0 | 2 | 1.85316 | 49.123      | 8.2   |
| 28  | 4 | 1 | 2 | 1.81533 | 50.217      | 0.1   |
| 29  | 4 | 3 | 0 | 1.80600 | 50.494      | 0.2   |
| 30  | 3 | 3 | 2 | 1.77972 | 51.293      | 4.4   |
| 31  | 5 | 1 | 0 | 1.77093 | 51.567      | 4.8   |
| 32  | 3 | 0 | 3 | 1.75669 | 52.016      | 0.1   |
| 33  | 5 | 0 | 1 | 1.73989 | 52.556      | 0.1   |
| 34  | 3 | 1 | 3 | 1.72436 | 53.066      | 0.9   |
| 35  | 4 | 2 | 2 | 1.71438 | 53.400      | 10.1  |
| 36  | 5 | 1 | 1 | 1.70847 | 53.599      | 5.5   |



---

|    |   |   |   |         |        |     |
|----|---|---|---|---------|--------|-----|
| 37 | 5 | 2 | 0 | 1.67683 | 54.694 | 0.1 |
| 38 | 3 | 2 | 3 | 1.63714 | 56.136 | 0.1 |
| 39 | 5 | 2 | 1 | 1.62250 | 56.688 | 1.7 |
| 40 | 4 | 4 | 0 | 1.59629 | 57.705 | 1.6 |
| 41 | 4 | 3 | 2 | 1.57806 | 58.436 | 0.3 |
| 42 | 1 | 1 | 4 | 1.57253 | 58.661 | 2.9 |
| 43 | 5 | 1 | 2 | 1.55450 | 59.409 | 5.6 |
| 44 | 5 | 3 | 0 | 1.54863 | 59.657 | 3.3 |
| 45 | 4 | 1 | 3 | 1.53908 | 60.065 | 0.2 |
| 46 | 2 | 0 | 4 | 1.52690 | 60.595 | 2.2 |
| 47 | 5 | 3 | 1 | 1.50634 | 61.511 | 1.0 |
| 48 | 5 | 2 | 2 | 1.48969 | 62.274 | 0.1 |
| 49 | 6 | 1 | 0 | 1.48452 | 62.515 | 0.1 |
| 50 | 4 | 2 | 3 | 1.47610 | 62.913 | 0.1 |
| 51 | 6 | 1 | 1 | 1.44643 | 64.356 | 0.9 |
| 52 | 4 | 4 | 2 | 1.43237 | 65.065 | 2.1 |
| 53 | 6 | 2 | 0 | 1.42777 | 65.301 | 2.3 |
| 54 | 3 | 1 | 4 | 1.41069 | 66.192 | 3.4 |
| 55 | 5 | 3 | 2 | 1.39763 | 66.892 | 3.5 |
| 56 | 6 | 2 | 1 | 1.39442 | 67.066 | 1.8 |
| 57 | 4 | 3 | 3 | 1.38639 | 67.506 | 0.1 |
| 58 | 5 | 4 | 1 | 1.37809 | 67.968 | 0.1 |
| 59 | 5 | 1 | 3 | 1.37033 | 68.406 | 0.1 |
| 60 | 6 | 0 | 2 | 1.36531 | 68.693 | 0.7 |
| 61 | 3 | 2 | 4 | 1.36172 | 68.899 | 0.4 |
| 62 | 6 | 1 | 2 | 1.34996 | 69.585 | 0.1 |
| 63 | 6 | 3 | 0 | 1.34611 | 69.813 | 0.1 |
| 64 | 6 | 3 | 1 | 1.31752 | 71.558 | 2.0 |
| 65 | 6 | 2 | 2 | 1.30686 | 72.233 | 2.4 |
| 66 | 4 | 1 | 4 | 1.30371 | 72.435 | 1.3 |
| 67 | 3 | 3 | 4 | 1.29033 | 73.308 | 1.2 |
| 68 | 7 | 1 | 0 | 1.27703 | 74.198 | 1.6 |
| 69 | 7 | 0 | 1 | 1.26477 | 75.041 | 2.8 |
| 70 | 5 | 3 | 3 | 1.25924 | 75.428 | 0.5 |
| 71 | 7 | 1 | 1 | 1.25224 | 75.924 | 0.8 |
| 72 | 6 | 3 | 2 | 1.24338 | 76.562 | 0.1 |
| 73 | 7 | 2 | 0 | 1.24037 | 76.782 | 0.1 |
| 74 | 2 | 1 | 5 | 1.23574 | 77.123 | 0.1 |
| 75 | 6 | 4 | 1 | 1.22956 | 77.582 | 0.1 |
| 76 | 6 | 1 | 3 | 1.22404 | 77.998 | 0.1 |
| 77 | 7 | 2 | 1 | 1.21831 | 78.435 | 0.1 |
| 78 | 4 | 3 | 4 | 1.20696 | 79.318 | 0.1 |

|    |   |   |   |         |        |     |
|----|---|---|---|---------|--------|-----|
| 79 | 5 | 1 | 4 | 1.19632 | 80.165 | 1.8 |
| 80 | 7 | 1 | 2 | 1.18833 | 80.815 | 2.4 |
| 81 | 7 | 3 | 0 | 1.18570 | 81.032 | 2.0 |
| 82 | 6 | 4 | 2 | 1.16827 | 82.501 | 1.1 |
| 83 | 5 | 2 | 4 | 1.16601 | 82.696 | 0.6 |
| 84 | 7 | 2 | 2 | 1.15861 | 83.341 | 0.1 |
| 85 | 6 | 5 | 0 | 1.15617 | 83.557 | 0.1 |
| 86 | 6 | 3 | 3 | 1.14292 | 84.749 | 0.1 |
| 87 | 6 | 5 | 1 | 1.13790 | 85.211 | 0.8 |
| 88 | 8 | 0 | 0 | 1.12875 | 86.069 | 0.3 |
| 89 | 5 | 3 | 4 | 1.12025 | 86.883 | 1.4 |
| 90 | 7 | 3 | 2 | 1.11368 | 87.525 | 1.3 |
| 91 | 8 | 1 | 1 | 1.10340 | 88.552 | 0.3 |
| 92 | 6 | 1 | 4 | 1.09505 | 89.407 | 1.1 |
| 93 | 4 | 2 | 5 | 1.09186 | 89.739 | 0.6 |

### Stick Pattern

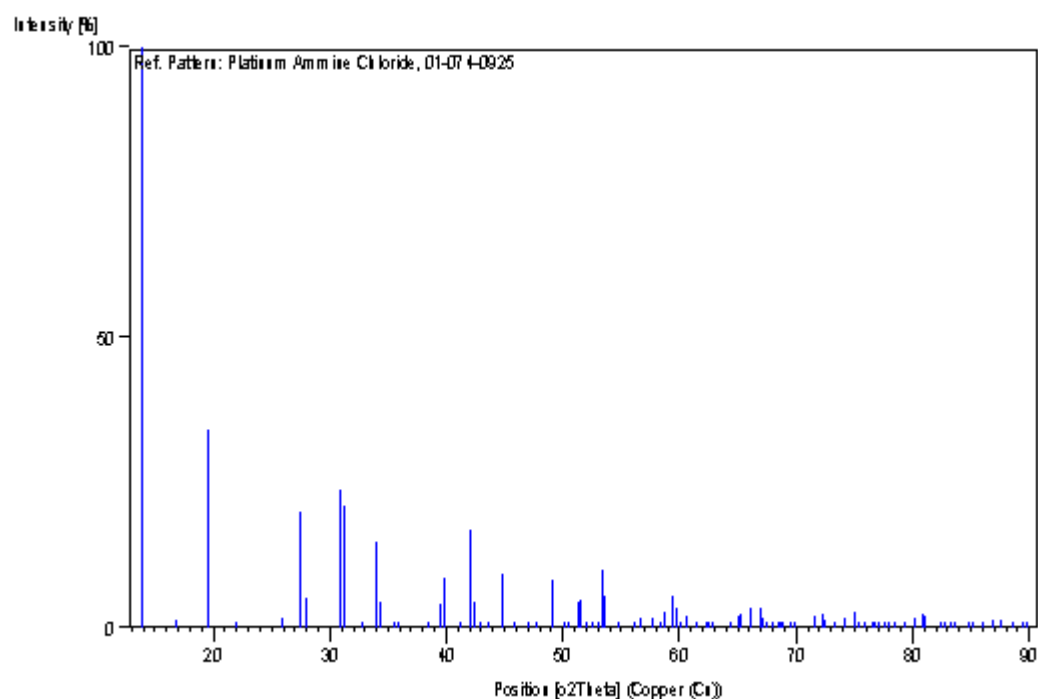

Supplement: s1 [file s1]
